# Supplementary material
Source: publisher figshare collection journal article supplement (https://acs.figshare.com/ndownloader/files/4073308)
Supplement: Supplementary file 1 [file 4073308]

 
data_PNala 
 
_audit_creation_method            SHELXL-97 
_chemical_name_systematic 
; 
 ? 
; 
_chemical_name_common             ? 
_chemical_melting_point           ? 
_chemical_formula_moiety          ? 
_chemical_formula_sum 
 'C52 H63 F3 N12 O6' 
_chemical_formula_weight          1009.14 
 
loop_ 
 _atom_type_symbol 
 _atom_type_description 
 _atom_type_scat_dispersion_real 
 _atom_type_scat_dispersion_imag 
 _atom_type_scat_source 
 'C'  'C'   0.0033   0.0016 
 'International Tables Vol C Tables 4.2.6.8 and 6.1.1.4' 
 'H'  'H'   0.0000   0.0000 
 'International Tables Vol C Tables 4.2.6.8 and 6.1.1.4' 
 'N'  'N'   0.0061   0.0033 
 'International Tables Vol C Tables 4.2.6.8 and 6.1.1.4' 
 'O'  'O'   0.0106   0.0060 
 'International Tables Vol C Tables 4.2.6.8 and 6.1.1.4' 
 'F'  'F'   0.0171   0.0103 
 'International Tables Vol C Tables 4.2.6.8 and 6.1.1.4' 
 
_symmetry_cell_setting            orthorhombic 
_symmetry_space_group_name_H-M    P2(1)2(1)2(1) 
 
loop_ 
 _symmetry_equiv_pos_as_xyz 
 'x, y, z' 
 '-x+1/2, -y, z+1/2' 
 '-x, y+1/2, -z+1/2' 
 'x+1/2, -y+1/2, -z' 
 
_cell_length_a                    10.100(2) 
_cell_length_b                    19.070(4) 
_cell_length_c                    26.030(5) 
_cell_angle_alpha                 90.00 
_cell_angle_beta                  90.00 
_cell_angle_gamma                 90.00 
_cell_volume                      5013.6(17) 
_cell_formula_units_Z             4 
_cell_measurement_temperature     100(2) 
_cell_measurement_reflns_used     ? 
_cell_measurement_theta_min       ? 
_cell_measurement_theta_max       ? 
 
_exptl_crystal_description        parallelpiped
_exptl_crystal_colour             colorless 
_exptl_crystal_size_max           0.10 
_exptl_crystal_size_mid           0.10 
_exptl_crystal_size_min           0.10 
_exptl_crystal_density_meas       ? 
_exptl_crystal_density_diffrn     1.337 
_exptl_crystal_density_method     'not measured' 
_exptl_crystal_F_000              2136 
_exptl_absorpt_coefficient_mu     0.097 
_exptl_absorpt_correction_type    none 
_exptl_absorpt_correction_T_min   0.9903 
_exptl_absorpt_correction_T_max   0.9903 
_exptl_absorpt_process_details    ? 
 
_exptl_special_details 
; 
 ? 
; 
 
_diffrn_ambient_temperature       100(2) 
_diffrn_radiation_wavelength      0.75 
_diffrn_radiation_type            MoK\a 
_diffrn_radiation_source          'synchrotron radiation' 
_diffrn_radiation_monochromator   'Bartels Monochromator with dual channel cut crystals (DCCM)'  
_diffrn_measurement_device_type   ? 
_diffrn_measurement_method        ? 
_diffrn_detector_area_resol_mean  ? 
_diffrn_standards_number          ? 
_diffrn_standards_interval_count  ? 
_diffrn_standards_interval_time   ? 
_diffrn_standards_decay_%         ? 
_diffrn_reflns_number             133471 
_diffrn_reflns_av_R_equivalents   0.0633 
_diffrn_reflns_av_sigmaI/netI     0.0280 
_diffrn_reflns_limit_h_min        -12 
_diffrn_reflns_limit_h_max        12 
_diffrn_reflns_limit_k_min        -23 
_diffrn_reflns_limit_k_max        23 
_diffrn_reflns_limit_l_min        -32 
_diffrn_reflns_limit_l_max        32 
_diffrn_reflns_theta_min          1.32 
_diffrn_reflns_theta_max          26.37 
_reflns_number_total              10027 
_reflns_number_gt                 9962 
_reflns_threshold_expression      >2sigma(I) 
 
_computing_data_collection        ? 
_computing_cell_refinement        ? 
_computing_data_reduction         ? 
_computing_structure_solution     'SHELXD (Sheldrick, 2008)' 
_computing_structure_refinement   'SHELXL-97 (Sheldrick, 1997)' 
_computing_molecular_graphics     ? 
_computing_publication_material   ? 
 
_refine_special_details 
; 
 Refinement of F^2^ against ALL reflections.  The weighted R-factor wR and 
 goodness of fit S are based on F^2^, conventional R-factors R are based 
 on F, with F set to zero for negative F^2^. The threshold expression of 
 F^2^ > 2sigma(F^2^) is used only for calculating R-factors(gt) etc. and is 
 not relevant to the choice of reflections for refinement.  R-factors based 
 on F^2^ are statistically about twice as large as those based on F, and R- 
 factors based on ALL data will be even larger. 
; 
 
_refine_ls_structure_factor_coef  Fsqd  
_refine_ls_matrix_type            full 
_refine_ls_weighting_scheme       calc  
_refine_ls_weighting_details 
 'calc w=1/[\s^2^(Fo^2^)+(0.0533P)^2^+2.4534P] where P=(Fo^2^+2Fc^2^)/3' 
_atom_sites_solution_primary      direct 
_atom_sites_solution_secondary    difmap 
_atom_sites_solution_hydrogens    geom 
_refine_ls_hydrogen_treatment     constr 
_refine_ls_extinction_method      SHELXL 
_refine_ls_extinction_coef        0.008(2) 
_refine_ls_extinction_expression 
 'Fc^*^=kFc[1+0.001xFc^2^\l^3^/sin(2\q)]^-1/4^' 
_refine_ls_abs_structure_details 
 'Flack H D (1983), Acta Cryst. A39, 876-881' 
_refine_ls_abs_structure_Flack    0.0172(5)
_chemical_absolute_configuration  rmad
_refine_ls_number_reflns          10027 
_refine_ls_number_parameters      659 
_refine_ls_number_restraints      0 
_refine_ls_R_factor_all           0.0387 
_refine_ls_R_factor_gt            0.0385 
_refine_ls_wR_factor_ref          0.0996 
_refine_ls_wR_factor_gt           0.0994 
_refine_ls_goodness_of_fit_ref    1.048 
_refine_ls_restrained_S_all       1.048 
_refine_ls_shift/su_max           0.001 
_refine_ls_shift/su_mean          0.000 
 
loop_ 
 _atom_site_label 
 _atom_site_type_symbol 
 _atom_site_fract_x 
 _atom_site_fract_y 
 _atom_site_fract_z 
 _atom_site_U_iso_or_equiv 
 _atom_site_adp_type 
 _atom_site_occupancy 
 _atom_site_symmetry_multiplicity 
 _atom_site_calc_flag 
 _atom_site_refinement_flags 
 _atom_site_disorder_assembly 
 _atom_site_disorder_group 
O2 O 0.41630(11) 0.92606(6) 0.15185(4) 0.0158(2) Uani 1 1 d . . . 
O3 O 0.30634(12) 1.08323(6) 0.23339(4) 0.0159(2) Uani 1 1 d . . . 
O5 O 0.08333(13) 1.01432(6) 0.47382(4) 0.0192(3) Uani 1 1 d . . . 
O6 O 0.42118(12) 1.06811(6) 0.41545(4) 0.0179(2) Uani 1 1 d . . . 
F2 F -0.33212(13) 0.73053(6) 0.51017(5) 0.0327(3) Uani 1 1 d . . . 
N5 N 0.48348(13) 1.05816(7) 0.28484(5) 0.0127(3) Uani 1 1 d . . . 
H5 H 0.5166 1.0613 0.3160 0.015 Uiso 1 1 calc R . . 
N12 N 0.02745(15) 0.99750(7) 0.55867(5) 0.0152(3) Uani 1 1 d . . . 
H12 H 0.0497 1.0100 0.5900 0.018 Uiso 1 1 calc R . . 
N4 N 0.42800(13) 0.92181(7) 0.23959(5) 0.0124(3) Uani 1 1 d . . . 
H4 H 0.3884 0.9079 0.2679 0.015 Uiso 1 1 calc R . . 
O4 O 0.22544(12) 0.92982(6) 0.31398(4) 0.0186(2) Uani 1 1 d . . . 
F1 F -0.47237(12) 0.80921(7) 0.53180(5) 0.0352(3) Uani 1 1 d . . . 
O1 O 0.08801(15) 1.04295(7) 0.07694(5) 0.0263(3) Uani 1 1 d . . . 
N10 N 0.40754(14) 1.06518(8) 0.50297(5) 0.0171(3) Uani 1 1 d . . . 
H10 H 0.4243 1.0412 0.5311 0.021 Uiso 1 1 calc R . . 
N11 N 0.13631(14) 1.09689(7) 0.53343(5) 0.0161(3) Uani 1 1 d . . . 
H11 H 0.1272 1.1105 0.5655 0.019 Uiso 1 1 calc R . . 
C014 C 0.36237(16) 0.91674(8) 0.19427(6) 0.0113(3) Uani 1 1 d . . . 
N3 N 0.23393(13) 0.89669(8) 0.19923(5) 0.0139(3) Uani 1 1 d . . . 
H3 H 0.2051 0.8857 0.2301 0.017 Uiso 1 1 calc R . . 
N6 N 0.29080(14) 1.09993(7) 0.31989(5) 0.0149(3) Uani 1 1 d . . . 
H6 H 0.3341 1.1041 0.3491 0.018 Uiso 1 1 calc R . . 
C017 C 0.88315(16) 1.13762(9) 0.22174(6) 0.0161(3) Uani 1 1 d . . . 
H017 H 0.9449 1.1001 0.2232 0.019 Uiso 1 1 calc R . . 
C018 C 0.56103(16) 0.94936(8) 0.24270(6) 0.0135(3) Uani 1 1 d . . . 
H01A H 0.6122 0.9324 0.2128 0.016 Uiso 1 1 calc R . . 
H01B H 0.6039 0.9308 0.2741 0.016 Uiso 1 1 calc R . . 
N7 N 0.09410(14) 1.00229(8) 0.36167(5) 0.0174(3) Uani 1 1 d . . . 
H7 H 0.0524 1.0075 0.3911 0.021 Uiso 1 1 calc R . . 
C020 C 0.18713(16) 0.95092(8) 0.35674(6) 0.0151(3) Uani 1 1 d . . . 
C021 C 0.21293(16) 1.26951(9) 0.46284(6) 0.0160(3) Uani 1 1 d . . . 
C022 C 0.35627(15) 1.07974(7) 0.27692(6) 0.0107(3) Uani 1 1 d . . . 
C023 C -0.15982(17) 0.84264(9) 0.50951(6) 0.0171(3) Uani 1 1 d . . . 
H023 H -0.1632 0.8125 0.4805 0.021 Uiso 1 1 calc R . . 
C024 C 0.06294(17) 1.04856(9) 0.31891(6) 0.0184(3) Uani 1 1 d . . . 
H02A H -0.0313 1.0625 0.3211 0.022 Uiso 1 1 calc R . . 
H02B H 0.0755 1.0227 0.2863 0.022 Uiso 1 1 calc R . . 
F3 F -0.37963(16) 0.74555(7) 0.58955(5) 0.0424(4) Uani 1 1 d . . . 
C026 C 0.42773(16) 1.03448(9) 0.45654(6) 0.0158(3) Uani 1 1 d . . . 
C027 C 0.08353(17) 0.70878(9) 0.10541(7) 0.0187(3) Uani 1 1 d . . . 
H027 H -0.0052 0.7170 0.0950 0.022 Uiso 1 1 calc R . . 
C028 C 0.70553(19) 1.24755(9) 0.21707(7) 0.0207(3) Uani 1 1 d . . . 
H028 H 0.6442 1.2853 0.2156 0.025 Uiso 1 1 calc R . . 
N8 N 0.23053(15) 0.92216(8) 0.40150(5) 0.0178(3) Uani 1 1 d . . . 
H8 H 0.1856 0.9298 0.4299 0.021 Uiso 1 1 calc R . . 
C030 C 0.27982(17) 1.24990(10) 0.41816(6) 0.0192(3) Uani 1 1 d . . . 
H030 H 0.2964 1.2017 0.4114 0.023 Uiso 1 1 calc R . . 
C031 C 0.14095(16) 0.89227(9) 0.15647(6) 0.0144(3) Uani 1 1 d . . . 
H031 H 0.1918 0.8975 0.1237 0.017 Uiso 1 1 calc R . . 
C032 C -0.06633(17) 0.89676(9) 0.51117(6) 0.0177(3) Uani 1 1 d . . . 
H032 H -0.0066 0.9033 0.4834 0.021 Uiso 1 1 calc R . . 
C033 C 0.14957(17) 1.11477(9) 0.31827(6) 0.0187(3) Uani 1 1 d . . . 
H03A H 0.1298 1.1419 0.2868 0.022 Uiso 1 1 calc R . . 
H03B H 0.1260 1.1444 0.3481 0.022 Uiso 1 1 calc R . . 
C034 C 0.06911(16) 0.82133(9) 0.15527(6) 0.0164(3) Uani 1 1 d . . . 
H03C H 0.0380 0.8108 0.1905 0.020 Uiso 1 1 calc R . . 
H03D H -0.0104 0.8264 0.1334 0.020 Uiso 1 1 calc R . . 
C035 C 0.71209(16) 1.05198(8) 0.25146(7) 0.0166(3) Uani 1 1 d . . . 
H03E H 0.7336 1.0473 0.2884 0.020 Uiso 1 1 calc R . . 
H03F H 0.7684 1.0181 0.2326 0.020 Uiso 1 1 calc R . . 
C036 C 0.35905(17) 1.13632(9) 0.50722(6) 0.0169(3) Uani 1 1 d . . . 
H03G H 0.4066 1.1662 0.4822 0.020 Uiso 1 1 calc R . . 
H03H H 0.3789 1.1543 0.5421 0.020 Uiso 1 1 calc R . . 
N1 N 0.22297(18) 1.11097(9) 0.12652(6) 0.0254(3) Uani 1 1 d . . . 
H1 H 0.2551 1.1184 0.1575 0.030 Uiso 1 1 calc R . . 
C038 C 0.75098(16) 1.12520(9) 0.23456(6) 0.0143(3) Uani 1 1 d . . . 
C039 C -0.06116(16) 0.94119(8) 0.55391(6) 0.0143(3) Uani 1 1 d . . . 
N2 N 0.10753(15) 1.02079(8) 0.16296(5) 0.0196(3) Uani 1 1 d . . . 
H2 H 0.1285 1.0384 0.1931 0.023 Uiso 1 1 calc R . . 
C041 C 0.56716(15) 1.03014(8) 0.24396(6) 0.0119(3) Uani 1 1 d . . . 
H041 H 0.5352 1.0488 0.2102 0.014 Uiso 1 1 calc R . . 
N9 N 0.45993(16) 0.96538(8) 0.45849(5) 0.0209(3) Uani 1 1 d . . . 
H9 H 0.4718 0.9457 0.4887 0.025 Uiso 1 1 calc R . . 
C043 C 0.08300(16) 1.03505(9) 0.51883(6) 0.0134(3) Uani 1 1 d . . . 
C044 C 0.20903(16) 1.14217(9) 0.49739(6) 0.0148(3) Uani 1 1 d . . . 
H044 H 0.1906 1.1256 0.4616 0.018 Uiso 1 1 calc R . . 
C045 C 0.13779(18) 1.05743(9) 0.11931(7) 0.0189(3) Uani 1 1 d . . . 
C046 C 0.34340(18) 0.68562(10) 0.13269(7) 0.0221(4) Uani 1 1 d . . . 
H046 H 0.4337 0.6783 0.1414 0.026 Uiso 1 1 calc R . . 
C047 C -0.14580(19) 0.92857(9) 0.59541(6) 0.0209(4) Uani 1 1 d . . . 
H047 H -0.1393 0.9569 0.6253 0.025 Uiso 1 1 calc R . . 
C048 C 0.15991(17) 1.21755(9) 0.50230(6) 0.0172(3) Uani 1 1 d . . . 
H04A H 0.0621 1.2172 0.4999 0.021 Uiso 1 1 calc R . . 
H04B H 0.1834 1.2349 0.5370 0.021 Uiso 1 1 calc R . . 
C049 C 0.18914(16) 1.34082(9) 0.47130(6) 0.0175(3) Uani 1 1 d . . . 
H049 H 0.1434 1.3549 0.5015 0.021 Uiso 1 1 calc R . . 
C050 C 0.14714(16) 0.75850(9) 0.13613(6) 0.0148(3) Uani 1 1 d . . . 
C051 C 0.28031(17) 0.74603(9) 0.14904(7) 0.0197(3) Uani 1 1 d . . . 
H051 H 0.3273 0.7794 0.1691 0.024 Uiso 1 1 calc R . . 
C052 C 0.66222(18) 1.18083(9) 0.23162(7) 0.0190(3) Uani 1 1 d . . . 
H052 H 0.5715 1.1734 0.2396 0.023 Uiso 1 1 calc R . . 
C053 C -0.2390(2) 0.87535(10) 0.59348(7) 0.0241(4) Uani 1 1 d . . . 
H053 H -0.2970 0.8679 0.6217 0.029 Uiso 1 1 calc R . . 
C054 C -0.24755(17) 0.83258(9) 0.54984(6) 0.0172(3) Uani 1 1 d . . . 
C055 C 0.47563(17) 0.92255(9) 0.41265(6) 0.0185(3) Uani 1 1 d . . . 
H055 H 0.4885 0.9544 0.3826 0.022 Uiso 1 1 calc R . . 
C056 C 0.32244(18) 1.30101(11) 0.38327(7) 0.0233(4) Uani 1 1 d . . . 
H056 H 0.3681 1.2873 0.3530 0.028 Uiso 1 1 calc R . . 
C057 C 0.29865(18) 1.37139(10) 0.39257(7) 0.0238(4) Uani 1 1 d . . . 
H057 H 0.3286 1.4059 0.3689 0.029 Uiso 1 1 calc R . . 
C058 C 0.34904(18) 0.87908(9) 0.40362(7) 0.0200(3) Uani 1 1 d . . . 
H05A H 0.3579 0.8529 0.3709 0.024 Uiso 1 1 calc R . . 
H05B H 0.3396 0.8444 0.4317 0.024 Uiso 1 1 calc R . . 
C059 C 0.14645(19) 0.64765(9) 0.08970(7) 0.0211(4) Uani 1 1 d . . . 
H059 H 0.1003 0.6142 0.0694 0.025 Uiso 1 1 calc R . . 
C060 C 0.83698(19) 1.25915(9) 0.20477(6) 0.0200(4) Uani 1 1 d . . . 
H060 H 0.8660 1.3046 0.1950 0.024 Uiso 1 1 calc R . . 
C061 C 0.04154(17) 0.95348(9) 0.16031(6) 0.0186(3) Uani 1 1 d . . . 
H06A H -0.0176 0.9527 0.1300 0.022 Uiso 1 1 calc R . . 
H06B H -0.0139 0.9472 0.1913 0.022 Uiso 1 1 calc R . . 
C062 C 0.92624(18) 1.20383(9) 0.20680(7) 0.0201(3) Uani 1 1 d . . . 
H062 H 1.0165 1.2112 0.1980 0.024 Uiso 1 1 calc R . . 
C063 C 0.23088(17) 1.39138(10) 0.43661(7) 0.0213(4) Uani 1 1 d . . . 
H063 H 0.2132 1.4395 0.4429 0.026 Uiso 1 1 calc R . . 
C064 C 0.59982(19) 0.87559(11) 0.41786(7) 0.0269(4) Uani 1 1 d . . . 
H06C H 0.6651 0.9004 0.4397 0.032 Uiso 1 1 calc R . . 
H06D H 0.5741 0.8321 0.4361 0.032 Uiso 1 1 calc R . . 
C065 C 0.27746(19) 0.63554(9) 0.10380(7) 0.0202(3) Uani 1 1 d . . . 
H065 H 0.3210 0.5936 0.0938 0.024 Uiso 1 1 calc R . . 
C066 C 0.66691(18) 0.85533(9) 0.36810(7) 0.0213(4) Uani 1 1 d . . . 
C067 C 0.62050(18) 0.80113(10) 0.33717(8) 0.0245(4) Uani 1 1 d . . . 
H067 H 0.5437 0.7760 0.3474 0.029 Uiso 1 1 calc R . . 
C068 C 0.78124(19) 0.89062(10) 0.35245(8) 0.0266(4) Uani 1 1 d . . . 
H068 H 0.8152 0.9276 0.3730 0.032 Uiso 1 1 calc R . . 
C069 C 0.84624(19) 0.87239(11) 0.30712(9) 0.0299(4) Uani 1 1 d . . . 
H069 H 0.9242 0.8966 0.2971 0.036 Uiso 1 1 calc R . . 
C070 C 0.2631(2) 1.15641(11) 0.08503(7) 0.0285(4) Uani 1 1 d . . . 
H07A H 0.3251 1.1917 0.0981 0.043 Uiso 0.50 1 calc PR . . 
H07B H 0.1851 1.1798 0.0707 0.043 Uiso 0.50 1 calc PR . . 
H07C H 0.3064 1.1286 0.0582 0.043 Uiso 0.50 1 calc PR . . 
H07D H 0.2193 1.1417 0.0532 0.043 Uiso 0.50 1 calc PR . . 
H07E H 0.3593 1.1536 0.0806 0.043 Uiso 0.50 1 calc PR . . 
H07F H 0.2380 1.2048 0.0931 0.043 Uiso 0.50 1 calc PR . . 
C071 C 0.7968(2) 0.81890(11) 0.27679(8) 0.0296(4) Uani 1 1 d . . . 
H071 H 0.8401 0.8067 0.2456 0.035 Uiso 1 1 calc R . . 
C072 C 0.6836(2) 0.78301(10) 0.29192(8) 0.0289(4) Uani 1 1 d . . . 
H072 H 0.6497 0.7461 0.2712 0.035 Uiso 1 1 calc R . . 
C100 C -0.3562(2) 0.77959(9) 0.54573(7) 0.0220(4) Uani 1 1 d . . . 
 
loop_ 
 _atom_site_aniso_label 
 _atom_site_aniso_U_11 
 _atom_site_aniso_U_22 
 _atom_site_aniso_U_33 
 _atom_site_aniso_U_23 
 _atom_site_aniso_U_13 
 _atom_site_aniso_U_12 
O2 0.0138(5) 0.0249(6) 0.0088(5) 0.0017(4) 0.0032(4) 0.0003(5) 
O3 0.0159(5) 0.0216(6) 0.0103(5) -0.0006(4) -0.0028(4) 0.0034(5) 
O5 0.0252(6) 0.0238(6) 0.0087(5) -0.0033(5) 0.0027(5) -0.0041(5) 
O6 0.0185(6) 0.0220(6) 0.0131(5) 0.0068(5) -0.0033(4) -0.0033(5) 
F2 0.0379(7) 0.0265(6) 0.0337(6) -0.0127(5) 0.0026(5) -0.0099(5) 
N5 0.0130(6) 0.0181(6) 0.0071(6) -0.0011(5) -0.0023(5) 0.0018(5) 
N12 0.0202(7) 0.0196(7) 0.0057(5) -0.0023(5) -0.0002(5) -0.0004(6) 
N4 0.0132(6) 0.0160(6) 0.0081(6) 0.0008(5) 0.0017(5) -0.0001(5) 
O4 0.0217(6) 0.0225(6) 0.0118(5) -0.0055(5) 0.0064(5) -0.0032(5) 
F1 0.0208(6) 0.0373(7) 0.0476(7) -0.0003(6) 0.0009(5) -0.0065(5) 
O1 0.0408(8) 0.0221(6) 0.0161(6) -0.0032(5) -0.0083(6) 0.0031(6) 
N10 0.0168(7) 0.0224(7) 0.0121(6) 0.0032(5) -0.0027(5) -0.0004(6) 
N11 0.0176(7) 0.0230(7) 0.0076(6) -0.0010(5) 0.0011(5) -0.0046(6) 
C014 0.0124(7) 0.0104(6) 0.0110(7) 0.0010(5) 0.0004(6) 0.0016(6) 
N3 0.0111(6) 0.0252(7) 0.0055(5) 0.0009(5) 0.0018(5) -0.0006(5) 
N6 0.0125(6) 0.0225(7) 0.0098(6) -0.0048(5) -0.0020(5) 0.0035(6) 
C017 0.0144(7) 0.0177(8) 0.0162(7) -0.0004(6) -0.0023(6) 0.0018(6) 
C018 0.0116(7) 0.0165(7) 0.0125(7) -0.0011(6) -0.0006(6) 0.0026(6) 
N7 0.0148(6) 0.0282(7) 0.0094(6) -0.0033(6) 0.0033(5) 0.0011(6) 
C020 0.0135(7) 0.0188(7) 0.0129(7) -0.0031(6) 0.0033(6) -0.0067(6) 
C021 0.0108(7) 0.0257(8) 0.0117(7) 0.0017(6) -0.0024(6) -0.0026(6) 
C022 0.0130(7) 0.0081(6) 0.0110(7) 0.0000(5) -0.0023(6) -0.0012(6) 
C023 0.0189(8) 0.0179(7) 0.0146(7) -0.0030(6) -0.0033(6) 0.0026(7) 
C024 0.0139(7) 0.0284(9) 0.0129(7) -0.0037(7) -0.0009(6) 0.0015(7) 
F3 0.0670(9) 0.0394(7) 0.0208(6) 0.0078(5) -0.0036(6) -0.0319(7) 
C026 0.0089(7) 0.0230(8) 0.0154(7) 0.0042(6) -0.0026(6) -0.0035(6) 
C027 0.0116(7) 0.0272(9) 0.0174(8) 0.0046(7) 0.0012(6) -0.0043(7) 
C028 0.0272(9) 0.0166(8) 0.0181(8) 0.0002(6) -0.0001(7) 0.0058(7) 
N8 0.0198(7) 0.0223(7) 0.0115(6) -0.0032(5) 0.0044(5) 0.0004(6) 
C030 0.0165(7) 0.0272(9) 0.0140(7) -0.0005(6) 0.0001(6) -0.0019(7) 
C031 0.0112(7) 0.0230(8) 0.0090(7) -0.0004(6) 0.0001(6) 0.0015(6) 
C032 0.0179(8) 0.0216(8) 0.0137(7) -0.0029(6) 0.0020(6) 0.0025(7) 
C033 0.0148(8) 0.0247(8) 0.0165(8) -0.0051(7) -0.0008(6) 0.0058(7) 
C034 0.0098(7) 0.0253(8) 0.0142(7) 0.0011(6) 0.0004(6) -0.0001(7) 
C035 0.0118(7) 0.0161(7) 0.0219(8) 0.0032(6) -0.0007(6) 0.0027(6) 
C036 0.0141(7) 0.0222(8) 0.0143(7) 0.0014(6) -0.0021(6) -0.0030(7) 
N1 0.0354(9) 0.0260(8) 0.0148(7) 0.0003(6) -0.0066(6) -0.0005(7) 
C038 0.0151(8) 0.0160(7) 0.0117(7) 0.0005(6) -0.0024(6) -0.0002(6) 
C039 0.0152(7) 0.0162(7) 0.0116(7) 0.0010(6) -0.0020(6) 0.0015(6) 
N2 0.0221(7) 0.0236(7) 0.0131(6) -0.0039(5) -0.0033(6) 0.0045(6) 
C041 0.0097(7) 0.0151(7) 0.0110(7) 0.0014(6) 0.0012(6) 0.0016(6) 
N9 0.0285(8) 0.0233(7) 0.0110(6) 0.0050(6) -0.0034(6) 0.0026(6) 
C043 0.0107(7) 0.0193(7) 0.0103(7) -0.0006(6) 0.0007(6) 0.0032(6) 
C044 0.0141(7) 0.0232(8) 0.0070(6) 0.0013(6) 0.0004(6) -0.0045(6) 
C045 0.0212(8) 0.0195(8) 0.0161(8) -0.0048(6) -0.0030(7) 0.0102(7) 
C046 0.0167(8) 0.0291(9) 0.0204(8) 0.0039(7) -0.0037(7) 0.0056(7) 
C047 0.0310(9) 0.0213(8) 0.0102(7) -0.0020(6) 0.0023(7) -0.0043(8) 
C048 0.0165(8) 0.0242(8) 0.0110(7) 0.0002(6) 0.0008(6) -0.0031(7) 
C049 0.0106(7) 0.0272(9) 0.0145(7) -0.0001(6) -0.0007(6) -0.0027(6) 
C050 0.0147(7) 0.0198(8) 0.0100(7) 0.0054(6) 0.0015(6) -0.0007(6) 
C051 0.0168(8) 0.0247(8) 0.0175(8) 0.0005(6) -0.0052(6) 0.0003(7) 
C052 0.0173(8) 0.0190(8) 0.0208(8) 0.0022(6) 0.0039(6) 0.0028(7) 
C053 0.0321(10) 0.0254(9) 0.0147(8) 0.0023(7) 0.0059(7) -0.0096(8) 
C054 0.0201(8) 0.0167(8) 0.0148(8) 0.0011(6) -0.0039(6) 0.0001(7) 
C055 0.0207(8) 0.0221(8) 0.0126(7) 0.0020(6) -0.0018(6) 0.0036(7) 
C056 0.0156(8) 0.0393(10) 0.0150(8) 0.0049(7) 0.0047(6) -0.0005(7) 
C057 0.0170(8) 0.0333(9) 0.0211(8) 0.0107(7) 0.0003(7) -0.0062(7) 
C058 0.0232(9) 0.0192(8) 0.0176(8) 0.0000(6) 0.0015(7) 0.0037(7) 
C059 0.0225(8) 0.0221(8) 0.0186(8) 0.0004(6) 0.0036(7) -0.0068(7) 
C060 0.0295(9) 0.0153(8) 0.0153(8) 0.0014(6) -0.0024(7) -0.0062(7) 
C061 0.0143(8) 0.0245(8) 0.0169(8) -0.0006(6) -0.0017(6) 0.0042(7) 
C062 0.0162(8) 0.0241(8) 0.0201(8) 0.0012(7) -0.0026(6) -0.0067(7) 
C063 0.0170(8) 0.0226(8) 0.0241(9) 0.0038(7) -0.0032(7) -0.0037(7) 
C064 0.0251(9) 0.0356(10) 0.0201(9) 0.0044(8) -0.0067(7) 0.0104(8) 
C065 0.0229(8) 0.0199(8) 0.0177(8) 0.0030(6) 0.0062(7) 0.0021(7) 
C066 0.0170(8) 0.0233(8) 0.0234(9) 0.0060(7) -0.0028(7) 0.0095(7) 
C067 0.0166(8) 0.0222(8) 0.0348(10) 0.0065(8) 0.0004(7) 0.0052(7) 
C068 0.0188(8) 0.0278(9) 0.0333(10) 0.0014(8) -0.0099(8) 0.0049(8) 
C069 0.0133(8) 0.0317(10) 0.0447(12) 0.0123(9) 0.0016(8) 0.0062(8) 
C070 0.0367(11) 0.0292(10) 0.0197(9) 0.0007(7) -0.0021(8) 0.0000(8) 
C071 0.0200(9) 0.0348(10) 0.0340(10) 0.0032(8) 0.0067(8) 0.0155(8) 
C072 0.0252(10) 0.0224(9) 0.0391(11) -0.0041(8) 0.0019(8) 0.0058(8) 
C100 0.0288(9) 0.0212(8) 0.0160(8) 0.0004(6) -0.0006(7) -0.0028(8) 
 
_geom_special_details 
; 
 All esds (except the esd in the dihedral angle between two l.s. planes) 
 are estimated using the full covariance matrix.  The cell esds are taken 
 into account individually in the estimation of esds in distances, angles 
 and torsion angles; correlations between esds in cell parameters are only 
 used when they are defined by crystal symmetry.  An approximate (isotropic) 
 treatment of cell esds is used for estimating esds involving l.s. planes. 
; 
 
loop_ 
 _geom_bond_atom_site_label_1 
 _geom_bond_atom_site_label_2 
 _geom_bond_distance 
 _geom_bond_site_symmetry_2 
 _geom_bond_publ_flag 
O2 C014 1.2439(19) . ? 
O3 C022 1.2422(19) . ? 
O5 C043 1.237(2) . ? 
O6 C026 1.249(2) . ? 
F2 C100 1.338(2) . ? 
N5 C022 1.365(2) . ? 
N5 C041 1.460(2) . ? 
N12 C043 1.379(2) . ? 
N12 C039 1.403(2) . ? 
N4 C014 1.357(2) . ? 
N4 C018 1.445(2) . ? 
O4 C020 1.245(2) . ? 
F1 C100 1.352(2) . ? 
O1 C045 1.243(2) . ? 
N10 C026 1.358(2) . ? 
N10 C036 1.446(2) . ? 
N11 C043 1.351(2) . ? 
N11 C044 1.472(2) . ? 
C014 N3 1.359(2) . ? 
N3 C031 1.459(2) . ? 
N6 C022 1.355(2) . ? 
N6 C033 1.455(2) . ? 
C017 C062 1.391(2) . ? 
C017 C038 1.396(2) . ? 
C018 C041 1.542(2) . ? 
N7 C020 1.364(2) . ? 
N7 C024 1.455(2) . ? 
C020 N8 1.360(2) . ? 
C021 C030 1.396(2) . ? 
C021 C049 1.398(2) . ? 
C021 C048 1.524(2) . ? 
C023 C054 1.387(2) . ? 
C023 C032 1.399(3) . ? 
C024 C033 1.536(2) . ? 
F3 C100 1.333(2) . ? 
C026 N9 1.358(2) . ? 
C027 C059 1.389(3) . ? 
C027 C050 1.397(2) . ? 
C028 C060 1.384(3) . ? 
C028 C052 1.398(2) . ? 
N8 C058 1.453(2) . ? 
C030 C056 1.400(3) . ? 
C031 C034 1.536(2) . ? 
C031 C061 1.543(2) . ? 
C032 C039 1.399(2) . ? 
C034 C050 1.518(2) . ? 
C035 C038 1.516(2) . ? 
C035 C041 1.534(2) . ? 
C036 C044 1.541(2) . ? 
N1 C045 1.348(3) . ? 
N1 C070 1.443(2) . ? 
C038 C052 1.391(2) . ? 
C039 C047 1.398(2) . ? 
N2 C045 1.368(2) . ? 
N2 C061 1.448(2) . ? 
N9 C055 1.455(2) . ? 
C044 C048 1.526(2) . ? 
C046 C065 1.386(3) . ? 
C046 C051 1.384(3) . ? 
C047 C053 1.385(3) . ? 
C049 C063 1.387(2) . ? 
C050 C051 1.407(2) . ? 
C053 C054 1.401(2) . ? 
C054 C100 1.496(2) . ? 
C055 C058 1.542(3) . ? 
C055 C064 1.547(2) . ? 
C056 C057 1.385(3) . ? 
C057 C063 1.388(3) . ? 
C059 C065 1.392(3) . ? 
C060 C062 1.389(3) . ? 
C064 C066 1.512(3) . ? 
C066 C067 1.391(3) . ? 
C066 C068 1.397(3) . ? 
C067 C072 1.383(3) . ? 
C068 C069 1.394(3) . ? 
C069 C071 1.383(3) . ? 
C071 C072 1.389(3) . ? 
 
loop_ 
 _geom_angle_atom_site_label_1 
 _geom_angle_atom_site_label_2 
 _geom_angle_atom_site_label_3 
 _geom_angle 
 _geom_angle_site_symmetry_1 
 _geom_angle_site_symmetry_3 
 _geom_angle_publ_flag 
C022 N5 C041 123.04(13) . . ? 
C043 N12 C039 126.18(13) . . ? 
C014 N4 C018 121.94(13) . . ? 
C026 N10 C036 121.54(14) . . ? 
C043 N11 C044 122.13(13) . . ? 
O2 C014 N4 123.21(14) . . ? 
O2 C014 N3 122.87(14) . . ? 
N4 C014 N3 113.82(13) . . ? 
C014 N3 C031 123.95(13) . . ? 
C022 N6 C033 120.65(13) . . ? 
C062 C017 C038 121.32(16) . . ? 
N4 C018 C041 113.69(13) . . ? 
C020 N7 C024 120.85(13) . . ? 
O4 C020 N8 122.35(15) . . ? 
O4 C020 N7 122.04(15) . . ? 
N8 C020 N7 115.54(14) . . ? 
C030 C021 C049 118.35(15) . . ? 
C030 C021 C048 123.87(16) . . ? 
C049 C021 C048 117.75(15) . . ? 
O3 C022 N6 122.66(14) . . ? 
O3 C022 N5 122.42(14) . . ? 
N6 C022 N5 114.86(13) . . ? 
C054 C023 C032 120.64(15) . . ? 
N7 C024 C033 112.55(14) . . ? 
O6 C026 N9 122.87(16) . . ? 
O6 C026 N10 122.20(16) . . ? 
N9 C026 N10 114.89(14) . . ? 
C059 C027 C050 121.85(16) . . ? 
C060 C028 C052 120.57(16) . . ? 
C020 N8 C058 121.74(14) . . ? 
C021 C030 C056 120.18(17) . . ? 
N3 C031 C034 111.75(13) . . ? 
N3 C031 C061 109.02(13) . . ? 
C034 C031 C061 111.12(14) . . ? 
C023 C032 C039 119.75(15) . . ? 
N6 C033 C024 113.46(14) . . ? 
C050 C034 C031 117.17(14) . . ? 
C038 C035 C041 117.42(13) . . ? 
N10 C036 C044 112.85(14) . . ? 
C045 N1 C070 122.01(15) . . ? 
C052 C038 C017 118.27(15) . . ? 
C052 C038 C035 123.47(15) . . ? 
C017 C038 C035 118.26(14) . . ? 
C047 C039 C032 119.15(15) . . ? 
C047 C039 N12 116.96(14) . . ? 
C032 C039 N12 123.86(15) . . ? 
C045 N2 C061 121.06(14) . . ? 
N5 C041 C035 111.11(13) . . ? 
N5 C041 C018 110.96(12) . . ? 
C035 C041 C018 108.19(13) . . ? 
C026 N9 C055 122.70(14) . . ? 
O5 C043 N11 123.00(15) . . ? 
O5 C043 N12 123.19(15) . . ? 
N11 C043 N12 113.81(14) . . ? 
N11 C044 C048 109.69(13) . . ? 
N11 C044 C036 110.02(13) . . ? 
C048 C044 C036 111.97(14) . . ? 
O1 C045 N1 123.35(17) . . ? 
O1 C045 N2 122.19(17) . . ? 
N1 C045 N2 114.44(15) . . ? 
C065 C046 C051 121.28(17) . . ? 
C053 C047 C039 120.89(15) . . ? 
C021 C048 C044 116.20(14) . . ? 
C063 C049 C021 121.42(16) . . ? 
C027 C050 C051 117.50(16) . . ? 
C027 C050 C034 119.00(15) . . ? 
C051 C050 C034 123.46(15) . . ? 
C046 C051 C050 120.51(17) . . ? 
C038 C052 C028 120.50(16) . . ? 
C047 C053 C054 119.87(16) . . ? 
C023 C054 C053 119.57(16) . . ? 
C023 C054 C100 120.54(15) . . ? 
C053 C054 C100 119.78(16) . . ? 
N9 C055 C058 109.67(14) . . ? 
N9 C055 C064 109.97(14) . . ? 
C058 C055 C064 111.99(15) . . ? 
C057 C056 C030 120.54(17) . . ? 
C056 C057 C063 119.72(16) . . ? 
N8 C058 C055 112.64(14) . . ? 
C027 C059 C065 119.76(17) . . ? 
C028 C060 C062 119.52(16) . . ? 
N2 C061 C031 111.97(14) . . ? 
C060 C062 C017 119.81(16) . . ? 
C049 C063 C057 119.78(17) . . ? 
C066 C064 C055 115.86(14) . . ? 
C046 C065 C059 119.03(17) . . ? 
C067 C066 C068 117.87(18) . . ? 
C067 C066 C064 122.31(18) . . ? 
C068 C066 C064 119.80(18) . . ? 
C072 C067 C066 121.53(18) . . ? 
C069 C068 C066 121.05(19) . . ? 
C071 C069 C068 119.79(19) . . ? 
C069 C071 C072 119.91(19) . . ? 
C067 C072 C071 119.85(19) . . ? 
F3 C100 F2 106.48(15) . . ? 
F3 C100 F1 106.19(16) . . ? 
F2 C100 F1 105.32(15) . . ? 
F3 C100 C054 113.45(15) . . ? 
F2 C100 C054 112.86(15) . . ? 
F1 C100 C054 111.94(15) . . ? 
 
loop_ 
 _geom_torsion_atom_site_label_1 
 _geom_torsion_atom_site_label_2 
 _geom_torsion_atom_site_label_3 
 _geom_torsion_atom_site_label_4 
 _geom_torsion 
 _geom_torsion_site_symmetry_1 
 _geom_torsion_site_symmetry_2 
 _geom_torsion_site_symmetry_3 
 _geom_torsion_site_symmetry_4 
 _geom_torsion_publ_flag 
C018 N4 C014 O2 10.1(2) . . . . ? 
C018 N4 C014 N3 -173.43(13) . . . . ? 
O2 C014 N3 C031 -7.9(2) . . . . ? 
N4 C014 N3 C031 175.60(14) . . . . ? 
C014 N4 C018 C041 82.36(18) . . . . ? 
C024 N7 C020 O4 -17.9(2) . . . . ? 
C024 N7 C020 N8 165.07(15) . . . . ? 
C033 N6 C022 O3 11.4(2) . . . . ? 
C033 N6 C022 N5 -171.37(14) . . . . ? 
C041 N5 C022 O3 -6.9(2) . . . . ? 
C041 N5 C022 N6 175.88(14) . . . . ? 
C020 N7 C024 C033 -90.02(18) . . . . ? 
C036 N10 C026 O6 8.8(2) . . . . ? 
C036 N10 C026 N9 -173.35(15) . . . . ? 
O4 C020 N8 C058 17.2(2) . . . . ? 
N7 C020 N8 C058 -165.73(15) . . . . ? 
C049 C021 C030 C056 0.6(2) . . . . ? 
C048 C021 C030 C056 178.42(16) . . . . ? 
C014 N3 C031 C034 129.52(16) . . . . ? 
C014 N3 C031 C061 -107.26(17) . . . . ? 
C054 C023 C032 C039 0.0(3) . . . . ? 
C022 N6 C033 C024 79.07(19) . . . . ? 
N7 C024 C033 N6 53.41(18) . . . . ? 
N3 C031 C034 C050 -75.46(17) . . . . ? 
C061 C031 C034 C050 162.52(14) . . . . ? 
C026 N10 C036 C044 77.35(19) . . . . ? 
C062 C017 C038 C052 0.6(2) . . . . ? 
C062 C017 C038 C035 -178.85(15) . . . . ? 
C041 C035 C038 C052 25.4(2) . . . . ? 
C041 C035 C038 C017 -155.19(15) . . . . ? 
C023 C032 C039 C047 3.0(2) . . . . ? 
C023 C032 C039 N12 -178.89(15) . . . . ? 
C043 N12 C039 C047 -154.80(16) . . . . ? 
C043 N12 C039 C032 27.0(3) . . . . ? 
C022 N5 C041 C035 144.80(14) . . . . ? 
C022 N5 C041 C018 -94.79(17) . . . . ? 
C038 C035 C041 N5 -80.17(18) . . . . ? 
C038 C035 C041 C018 157.80(14) . . . . ? 
N4 C018 C041 N5 53.55(17) . . . . ? 
N4 C018 C041 C035 175.68(13) . . . . ? 
O6 C026 N9 C055 -6.8(3) . . . . ? 
N10 C026 N9 C055 175.36(16) . . . . ? 
C044 N11 C043 O5 -5.1(2) . . . . ? 
C044 N11 C043 N12 175.33(14) . . . . ? 
C039 N12 C043 O5 -15.9(3) . . . . ? 
C039 N12 C043 N11 163.65(15) . . . . ? 
C043 N11 C044 C048 132.35(15) . . . . ? 
C043 N11 C044 C036 -104.06(17) . . . . ? 
N10 C036 C044 N11 57.48(17) . . . . ? 
N10 C036 C044 C048 179.74(13) . . . . ? 
C070 N1 C045 O1 0.2(3) . . . . ? 
C070 N1 C045 N2 -178.30(17) . . . . ? 
C061 N2 C045 O1 15.0(3) . . . . ? 
C061 N2 C045 N1 -166.46(15) . . . . ? 
C032 C039 C047 C053 -3.6(3) . . . . ? 
N12 C039 C047 C053 178.17(17) . . . . ? 
C030 C021 C048 C044 13.1(2) . . . . ? 
C049 C021 C048 C044 -169.01(15) . . . . ? 
N11 C044 C048 C021 -172.55(13) . . . . ? 
C036 C044 C048 C021 65.00(18) . . . . ? 
C030 C021 C049 C063 -0.3(2) . . . . ? 
C048 C021 C049 C063 -178.26(15) . . . . ? 
C059 C027 C050 C051 2.6(2) . . . . ? 
C059 C027 C050 C034 -175.31(15) . . . . ? 
C031 C034 C050 C027 -141.11(15) . . . . ? 
C031 C034 C050 C051 41.1(2) . . . . ? 
C065 C046 C051 C050 -0.7(3) . . . . ? 
C027 C050 C051 C046 -1.6(2) . . . . ? 
C034 C050 C051 C046 176.25(16) . . . . ? 
C017 C038 C052 C028 -1.2(2) . . . . ? 
C035 C038 C052 C028 178.23(16) . . . . ? 
C060 C028 C052 C038 0.8(3) . . . . ? 
C039 C047 C053 C054 1.1(3) . . . . ? 
C032 C023 C054 C053 -2.5(3) . . . . ? 
C032 C023 C054 C100 173.70(16) . . . . ? 
C047 C053 C054 C023 1.9(3) . . . . ? 
C047 C053 C054 C100 -174.31(17) . . . . ? 
C026 N9 C055 C058 -99.86(19) . . . . ? 
C026 N9 C055 C064 136.57(17) . . . . ? 
C021 C030 C056 C057 -0.1(3) . . . . ? 
C030 C056 C057 C063 -0.6(3) . . . . ? 
C020 N8 C058 C055 88.43(18) . . . . ? 
N9 C055 C058 N8 54.42(18) . . . . ? 
C064 C055 C058 N8 176.80(14) . . . . ? 
C050 C027 C059 C065 -1.3(3) . . . . ? 
C052 C028 C060 C062 0.2(3) . . . . ? 
C045 N2 C061 C031 89.58(18) . . . . ? 
N3 C031 C061 N2 54.77(17) . . . . ? 
C034 C031 C061 N2 178.36(13) . . . . ? 
C028 C060 C062 C017 -0.8(3) . . . . ? 
C038 C017 C062 C060 0.4(3) . . . . ? 
C021 C049 C063 C057 -0.5(3) . . . . ? 
C056 C057 C063 C049 0.9(3) . . . . ? 
N9 C055 C064 C066 -151.90(17) . . . . ? 
C058 C055 C064 C066 85.9(2) . . . . ? 
C051 C046 C065 C059 2.1(3) . . . . ? 
C027 C059 C065 C046 -1.0(3) . . . . ? 
C055 C064 C066 C067 -80.4(2) . . . . ? 
C055 C064 C066 C068 101.0(2) . . . . ? 
C068 C066 C067 C072 -0.9(3) . . . . ? 
C064 C066 C067 C072 -179.58(17) . . . . ? 
C067 C066 C068 C069 0.4(3) . . . . ? 
C064 C066 C068 C069 179.09(17) . . . . ? 
C066 C068 C069 C071 0.5(3) . . . . ? 
C068 C069 C071 C072 -0.8(3) . . . . ? 
C066 C067 C072 C071 0.6(3) . . . . ? 
C069 C071 C072 C067 0.3(3) . . . . ? 
C023 C054 C100 F3 142.37(17) . . . . ? 
C053 C054 C100 F3 -41.5(2) . . . . ? 
C023 C054 C100 F2 21.1(2) . . . . ? 
C053 C054 C100 F2 -162.69(16) . . . . ? 
C023 C054 C100 F1 -97.47(19) . . . . ? 
C053 C054 C100 F1 78.7(2) . . . . ? 
 
_diffrn_measured_fraction_theta_max    0.976 
_diffrn_reflns_theta_full              26.37 
_diffrn_measured_fraction_theta_full   0.976 
_refine_diff_density_max    0.287 
_refine_diff_density_min   -0.298 
_refine_diff_density_rms    0.046 
